# Supplementary material for: Differential Role of the RAC1-Binding Proteins FAM49b (CYRI-B) and CYFIP1 in Platelets
Source: MDPI journal article supplement (doi:10.3390/cells13040299), 2024-02-06
Supplement: s1 [file s1]

## SUPPLEMENTAL INFORMATION

### Differential role of the RAC1-binding proteins FAM49b (CYRI-B) and CYFIP1 in platelets

Dmitri Sisario<sup>1</sup>, Markus Spindler<sup>1</sup>, Katharina J. Ermer<sup>1,†</sup>, Noah Grütz<sup>1</sup>, Leo Nicolai<sup>2,3</sup>, Florian Gaertner<sup>2,3</sup>, Laura M. Machesky<sup>4</sup>, Markus Bender<sup>1,\*</sup>

<sup>1</sup>Institute of Experimental Biomedicine–Chair I, University Hospital Würzburg, 97080 Würzburg, Germany

<sup>2</sup>Medizinische Klinik und Poliklinik I, University Hospital Ludwig-Maximilian University, 81377 Munich, Germany

<sup>3</sup>German Centre for Cardiovascular Research, Partner Site Munich Heart Alliance, 81377 Munich, Germany

<sup>4</sup>Department of Biochemistry, University of Cambridge, Sanger Building, 80 Tennis Court Road, Cambridge CB2 1GA, UK

<sup>†</sup>Current affiliation: Comprehensive Heart Failure Center, Department of Translational Science, University Hospital Würzburg, 97078 Würzburg, Germany.

\*Corresponding author:

Markus Bender, Email: [bender\\_m1@ukw.de](mailto:bender_m1@ukw.de)

**Supplemental Table S1.** Glycoprotein expression in *Cyfp1<sup>-/-</sup>*, *Fam49b<sup>-/-</sup>* and *Cyfp1/  
Fam49b<sup>-/-</sup>* platelets. Platelet glycoprotein expression was determined via flow cytometry (n = 6). Values are presented as mean  $\pm$  standard deviation. \**P* < .05, \*\**P* < .01.

|                        | <i>Cyfp1<sup>+/+</sup></i> | <i>Cyfp1<sup>-/-</sup></i> | significance |
|------------------------|----------------------------|----------------------------|--------------|
| $\beta$ 1              | 7044 $\pm$ 200,6           | 7125 $\pm$ 131,5           | ns           |
| GPIb                   | 16577 $\pm$ 789,7          | 15988 $\pm$ 794,3          | ns           |
| GPV                    | 11152 $\pm$ 337,5          | 10791 $\pm$ 353,8          | ns           |
| GPIX                   | 20852 $\pm$ 440,2          | 19843 $\pm$ 875,1          | *            |
| $\alpha$ IIb $\beta$ 3 | 28755 $\pm$ 1116           | 27538 $\pm$ 1012           | ns           |
| $\alpha$ 2             | 1934 $\pm$ 61,17           | 1763 $\pm$ 238,1           | *            |
| GPVI                   | 1973 $\pm$ 61,02           | 1918 $\pm$ 145             | ns           |
| CLEC-2                 | 5024 $\pm$ 327             | 4732 $\pm$ 502,2           | ns           |

|                        | <i>Fam49b<sup>+/+</sup></i> | <i>Fam49b<sup>-/-</sup></i> | significance |
|------------------------|-----------------------------|-----------------------------|--------------|
| $\beta$ 1              | 7552 $\pm$ 151,7            | 7245 $\pm$ 179              | **           |
| GPIb                   | 16033 $\pm$ 1886            | 17670 $\pm$ 979,7           | ns           |
| GPV                    | 11086 $\pm$ 327,6           | 10993 $\pm$ 288,1           | ns           |
| GPIX                   | 21730 $\pm$ 461,3           | 21062 $\pm$ 624,7           | ns           |
| $\alpha$ IIb $\beta$ 3 | 30189 $\pm$ 1816            | 27808 $\pm$ 1192            | ns           |
| $\alpha$ 2             | 2257 $\pm$ 95,67            | 2137 $\pm$ 116,5            | ns           |
| GPVI                   | 2090 $\pm$ 95,9             | 2091 $\pm$ 47,71            | ns           |
| CLEC-2                 | 5503 $\pm$ 168,6            | 5461 $\pm$ 228,5            | ns           |

|                        | <i>Cyfp1/Fam49b<sup>+/+</sup></i> | <i>Cyfp1/Fam49b<sup>-/-</sup></i> | significance |
|------------------------|-----------------------------------|-----------------------------------|--------------|
| $\beta$ 1              | 6941 $\pm$ 163                    | 7023 $\pm$ 143                    | ns           |
| GPIb                   | 14478 $\pm$ 466                   | 14004 $\pm$ 490                   | ns           |
| GPV                    | 10877 $\pm$ 323                   | 10487 $\pm$ 357                   | ns           |
| GPIX                   | 17821 $\pm$ 247                   | 17172 $\pm$ 509                   | *            |
| $\alpha$ IIb $\beta$ 3 | 18368 $\pm$ 322                   | 17698 $\pm$ 610                   | ns           |
| $\alpha$ 2             | 2668 $\pm$ 127                    | 2689 $\pm$ 20,8                   | ns           |
| GPVI                   | 2486 $\pm$ 28,4                   | 2474 $\pm$ 89,4                   | ns           |
| CLEC-2                 | 5278 $\pm$ 213                    | 5065 $\pm$ 223                    | ns           |

## Supplemental Methods

### Platelet spreading upon ADP-stimulation

For platelet spreading experiments, coverslips were incubated with human fibrinogen (100  $\mu\text{g/ml}$ ; Sigma) overnight at 4°C and blocked with BSA (1%) at 37°C for one hour. The coated slides were washed with Tyrode's buffer before preactivated platelets (10  $\mu\text{M}$  ADP (Sigma)), were allowed to spread on the coverslips. After 30 minutes, platelets were fixed with 4% paraformaldehyde (PFA) in PBS containing 0.1% Triton-X100 for 10 min, washed with PBS and blocked with 5% BSA in PBS for one hour. Subsequently, the samples were stained with AlexaFluor 647-conjugated phalloidin for 1 hour at RT, washed with PBS and imbedded in mounting medium. Spread platelets were visualized with a Leica TCS SP8 inverted confocal microscope (100x/1.4 oil objective, Leica, Germany). Images were analyzed using ImageJ.

## Supplemental Figures

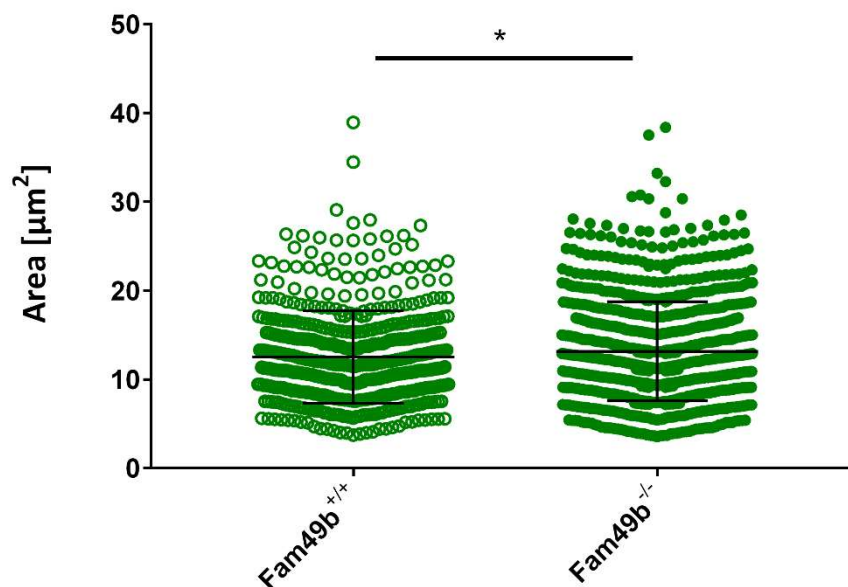

**Supplemental Figure S1.** Quantification of the projected cell area of ADP-stimulated *Fam49b*<sup>+/+</sup>- and *Fam49b*<sup>-/-</sup>-platelets after 30 minutes of spreading on fibrinogen-coated surfaces. The area of mutated cells was increased. For each condition, at least 500 cells were analyzed. Values are mean plus or minus SD. \* $P < 0.05$ .
